# Supplementary material for: Rates of Acquisition and Clearance of Pneumococcal Serotypes in the Nasopharynges of Children in Kilifi District, Kenya
Source: PubMed Central journal article supplement — J Infect Dis. 2012 Jul 24;206(7):1020–9. doi: 10.1093/infdis/jis447 (PMC3433858; doi:10.1093/infdis/jis447), 2012-07-24

## Supplementary Online Material

### **The rates of acquisition and clearance of pneumococcal serotypes in the nasopharynges of children in Kilifi District, Kenya.**

Osman Abdullahi, Angela Karani, Caroline Tigoi, Daisy Mugo, Stella Kungu, Eva Wanjiru, Jane Jomo, Robert Musyimi, Marc Lipsitch, J. Anthony G. Scott

#### **Contents**

Table S1. Rates of clearance and acquisition of pneumococcal carriage and carriage duration by age

Table S2. Rates of Immune clearance and total clearance by age

Figure S1. Scatter graphs and linear fit for serotype-specific estimates of prevalence, clearance and acquisition.

**Table S1. Rates of clearance and acquisition of pneumococcal carriage and mean carriage duration by age**

| Age (m) | N   | Clearance |                 | Carriage duration (days) |             | Acquisition |                 |
|---------|-----|-----------|-----------------|--------------------------|-------------|-------------|-----------------|
|         |     | rate/day  | 95%CI           | Point estimate           | 95%Cis      | rate/day    | 95%CI           |
| 3-5     | 78  | 0.0219    | 0.0163 - 0.0293 | 45.7                     | 34.2 - 61.2 | 0.0568      | 0.0341 - 0.0949 |
| 6-11    | 220 | 0.0206    | 0.0131 - 0.0325 | 48.5                     | 30.8 - 76.4 | 0.0782      | 0.0456 - 0.1341 |
| 12-17   | 225 | 0.0276    | 0.0175 - 0.0434 | 36.2                     | 23.0 - 57.0 | 0.0786      | 0.0467 - 0.1323 |
| 18-23   | 230 | 0.0233    | 0.0149 - 0.0365 | 42.9                     | 27.4 - 67.3 | 0.0564      | 0.0339 - 0.0937 |
| 24-29   | 202 | 0.0341    | 0.0217 - 0.0535 | 29.3                     | 18.7 - 46.1 | 0.0702      | 0.0421 - 0.1171 |
| 30-35   | 199 | 0.0296    | 0.0188 - 0.0464 | 33.8                     | 21.6 - 53.1 | 0.0525      | 0.0317 - 0.0872 |
| 36-41   | 180 | 0.0433    | 0.0275 - 0.0682 | 23.1                     | 14.7 - 36.4 | 0.0803      | 0.0479 - 0.1347 |
| 42-47   | 190 | 0.0527    | 0.0334 - 0.0832 | 19.0                     | 12.0 - 29.9 | 0.0834      | 0.0501 - 0.1390 |
| 48-53   | 186 | 0.0465    | 0.0295 - 0.0733 | 21.5                     | 13.6 - 33.9 | 0.0651      | 0.0392 - 0.1080 |
| 54-59   | 158 | 0.0472    | 0.0298 - 0.0748 | 21.2                     | 13.4 - 33.5 | 0.0498      | 0.0299 - 0.0829 |

**Table S2. Rates of Immune clearance and total clearance by age**

| <b>Age (m)</b> | <b>Immune Clearance</b> |                 | <b>Total Clearance</b> |                 |
|----------------|-------------------------|-----------------|------------------------|-----------------|
|                | <b>Rate</b>             | <b>95% CI</b>   | <b>Rate</b>            | <b>95% CI</b>   |
| 3-5            | 0.0074                  | 0.0125 - 0.0044 | 0.0219                 | 0.0163 - 0.0293 |
| 6-11           | 0.0067                  | 0.0152 - 0.0029 | 0.0206                 | 0.0131 - 0.0325 |
| 12-17          | 0.0101                  | 0.0227 - 0.0045 | 0.0276                 | 0.0175 - 0.0434 |
| 18-23          | 0.0102                  | 0.0226 - 0.0046 | 0.0233                 | 0.0149 - 0.0365 |
| 24-29          | 0.0159                  | 0.0352 - 0.0072 | 0.0341                 | 0.0217 - 0.0535 |
| 30-35          | 0.0138                  | 0.0304 - 0.0062 | 0.0296                 | 0.0188 - 0.0464 |
| 36-41          | 0.0199                  | 0.0442 - 0.009  | 0.0433                 | 0.0275 - 0.0682 |
| 42-47          | 0.0288                  | 0.0635 - 0.0131 | 0.0527                 | 0.0334 - 0.0832 |
| 48-53          | 0.0280                  | 0.0612 - 0.0128 | 0.0465                 | 0.0295 - 0.0733 |
| 54-59          | 0.0290                  | 0.0637 - 0.0132 | 0.0472                 | 0.0298 - 0.0748 |

Figure S1. Scatter graphs and linear fit for serotype-specific estimates of prevalence, clearance and acquisition.

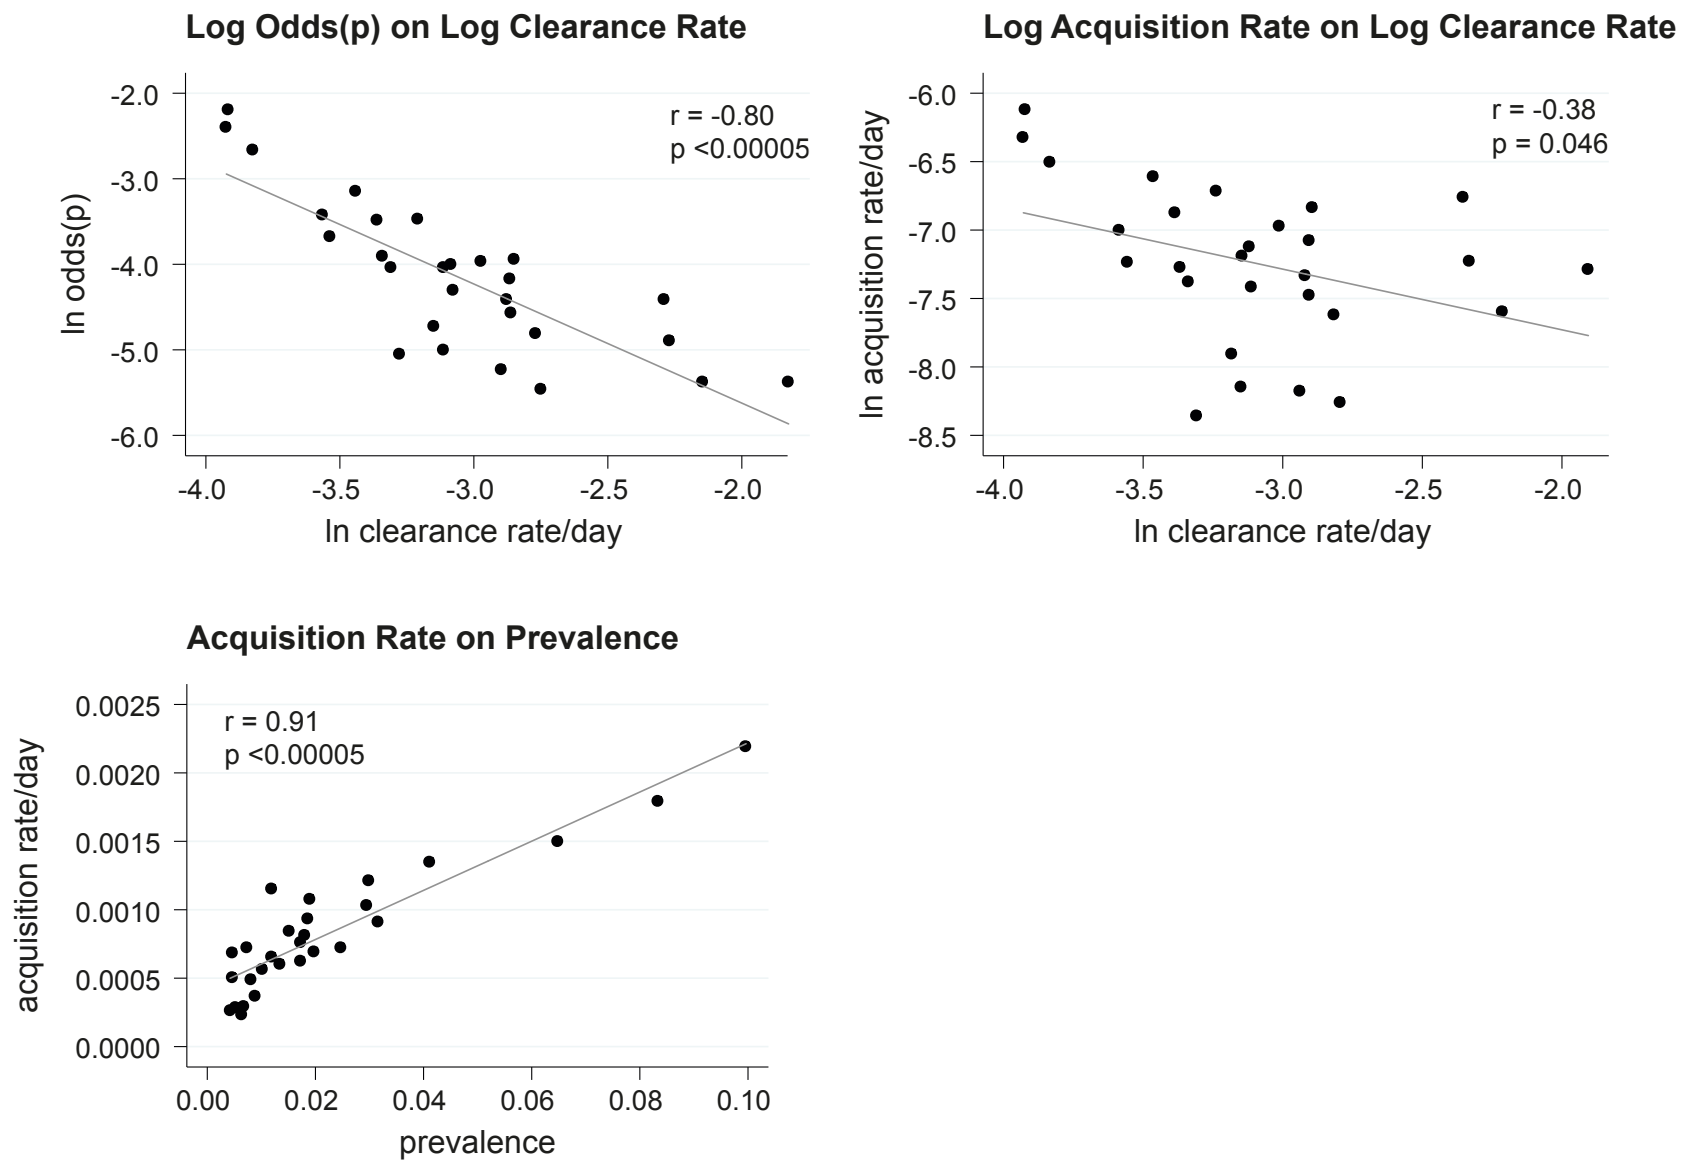

Supplement: supp_jis447_jis447supp.pdf [file supp_jis447_jis447supp.pdf]
